# Supplementary material
Source: publisher figshare collection journal article supplement (https://frontiersin.figshare.com/ndownloader/files/24699590)
Supplement: Supplementary file [file 24699590]

## Table of Contents:

1. Supplemental Table 1: page 2
  - a. Study 1 Regression Analyses Predicting Altruistic Giving to Strangers, Controlling for Social Desirability; referenced in section 2.2.4
2. Supplemental Table 2: page 3
  - a. Study 1 Regression Analyses Predicting Altruistic Giving to Strangers, Controlling for Gender; referenced in section 2.2.4
3. Supplemental Table 3: pages 4-5
  - a. Study 2 Regression Analyses Predicting Social Support Given and Responsiveness to Close Others, Controlling for Social Desirability; referenced in section 3.2.3
4. Supplemental Table 4: pages 6-7
  - a. Study 2 Regression Analyses Predicting Social Support Given and Responsiveness to Close Others, Controlling for Gender; referenced in section 3.2.3
5. Supplemental Table 5: pages 8-9
  - a. Study 3 Analyses Predicting Other-Focused Reasons for Giving and Gratitude, Controlling for Gender; referenced in section 4.2.3
6. Supplement to Section 4.2.4 Compassionate Goals, Other-Focused Reasons for Giving, and Friend's Gratitude: page 10
7. Supplemental Table 6: page 10
  - a. Study 3 Supplemental Analyses Examining Participants' Other-Focused Reasons for Giving, Controlling for Participants' Compassionate Goals, Self-Focused Reasons for Giving, and Other Measures of Prosocial Orientations; referenced in section 4.2.4
8. Measures for All Studies: pages 11-20

Supplemental Table 1.

## Study 1 Regression Analyses Predicting Altruistic Giving to Strangers, Controlling for Social Desirability

|                                                | Covariate |         |             |          | Social Desirability |         |             |          | Compassionate Goals |         |            |          |
|------------------------------------------------|-----------|---------|-------------|----------|---------------------|---------|-------------|----------|---------------------|---------|------------|----------|
|                                                | b         | $\beta$ | 95%CI       | <i>p</i> | b                   | $\beta$ | 95%CI       | <i>p</i> | b                   | $\beta$ | 95%CI      | <i>p</i> |
| <u>Covariates Entered in Separate Analyses</u> |           |         |             |          |                     |         |             |          |                     |         |            |          |
| Compassionate Love                             | .36       | .41     | [.28, .43]  | < .001   | .21                 | .05     | [-.12, .54] | .208     | .14                 | .12     | [.05, .24] | .004     |
| Communal Orientation                           | .23       | .17     | [.11, .34]  | < .001   | .52                 | .12     | [.17, .87]  | .003     | .24                 | .21     | [.13, .35] | < .001   |
| Communion                                      | .13       | .11     | [.03, .24]  | .016     | .49                 | .11     | [.14, .85]  | .006     | .28                 | .34     | [.17, .39] | < .001   |
| Unmitigated Communion                          | .25       | .22     | [.16, .35]  | < .001   | .51                 | .12     | [.16, .85]  | .004     | .23                 | .19     | [.13, .33] | < .001   |
| Empathic Concern                               | .17       | .18     | [.09, .25]  | < .001   | .51                 | .12     | [.16, .85]  | .004     | .24                 | .21     | [.14, .35] | < .001   |
| <u>Covariates Entered in a Single Analysis</u> |           |         |             |          |                     |         |             |          |                     |         |            |          |
| Compassionate Love                             | .36       | .41     | [.27, .45]  | < .001   |                     |         |             |          |                     |         |            |          |
| Communal Orientation                           | .03       | .02     | [-.03, .19] | .661     |                     |         |             |          |                     |         |            |          |
| Communion                                      | -.03      | -.03    | [-.15, .09] | .611     |                     |         |             |          |                     |         |            |          |
| Unmitigated Communion                          | .08       | .07     | [-.03, .09] | .153     |                     |         |             |          |                     |         |            |          |
| Empathic Concern                               | -.06      | -.07    | [-.17, .04] | .223     |                     |         |             |          |                     |         |            |          |
| Social Desirability                            | .22       | .05     | [-.11, .56] | .190     |                     |         |             |          |                     |         |            |          |
| Compassionate Goals                            | .14       | .12     | [.04, .25]  | .009     |                     |         |             |          |                     |         |            |          |

N = 571 for all analyses

Supplemental Table 2.

## Study 1 Regression Analyses Predicting Altruistic Giving to Strangers, Controlling for Gender

|                                                | Covariate |         |             |        | Gender |         |             |      | Compassionate Goals |         |            |        |
|------------------------------------------------|-----------|---------|-------------|--------|--------|---------|-------------|------|---------------------|---------|------------|--------|
|                                                | b         | $\beta$ | 95%CI       | p      | b      | $\beta$ | 95%CI       | p    | b                   | $\beta$ | 95%CI      | p      |
| <u>Covariates Entered in Separate Analyses</u> |           |         |             |        |        |         |             |      |                     |         |            |        |
| Compassionate Love                             | .38       | .43     | [.30, .45]  | < .001 | -.08   | -.06    | [-.17, .02] | .116 | .16                 | .14     | [.07, .26] | .001   |
| Communal Orientation                           | .24       | .19     | [.13, .36]  | < .001 | -.03   | -.02    | [-.13, .08] | .616 | .28                 | .24     | [.17, .39] | < .001 |
| Communion                                      | .16       | .14     | [.05, .26]  | .004   | -.01   | -.01    | [-.11, .10] | .886 | .31                 | .26     | [.20, .41] | < .001 |
| Unmitigated Communion                          | .26       | .23     | [.17, .36]  | < .001 | -.01   | -.01    | [-.11, .09] | .836 | .27                 | .23     | [.16, .37] | < .001 |
| Empathic Concern                               | .19       | .20     | [.11, .28]  | < .001 | -.05   | -.04    | [-.16, .05] | .318 | .28                 | .20     | [.18, .38] | < .001 |
| <u>Covariates Entered in a Single Analysis</u> |           |         |             |        |        |         |             |      |                     |         |            |        |
| Compassionate Love                             | .38       | .43     | [.29, .47]  | < .001 |        |         |             |      |                     |         |            |        |
| Communal Orientation                           | .03       | .02     | [-.11, .17] | .660   |        |         |             |      |                     |         |            |        |
| Communion                                      | -.02      | -.02    | [-.14, .10] | .705   |        |         |             |      |                     |         |            |        |
| Unmitigated Communion                          | .07       | .06     | [-.04, .18] | .186   |        |         |             |      |                     |         |            |        |
| Empathic Concern                               | -.05      | -.06    | [-.16, .05] | .315   |        |         |             |      |                     |         |            |        |
| Gender                                         | -.07      | -.05    | [-.17, .03] | .187   |        |         |             |      |                     |         |            |        |
| Compassionate Goals                            | .16       | .13     | [.05, .27]  | .004   |        |         |             |      |                     |         |            |        |

N = 571 for all analyses

Supplemental Table 3.

## Study 2 Regression Analyses Predicting Social Support Given and Responsiveness to Close Others, Controlling for Social Desirability

|                                         | Covariate |         |              |        | Social Desirability |         |               |        | Compassionate Goals |         |            |        |
|-----------------------------------------|-----------|---------|--------------|--------|---------------------|---------|---------------|--------|---------------------|---------|------------|--------|
|                                         | b         | $\beta$ | 95%CI        | p      | b                   | $\beta$ | 95%CI         | p      | b                   | $\beta$ | 95%CI      | p      |
| <u>DV: Social Support Given</u>         |           |         |              |        |                     |         |               |        |                     |         |            |        |
| Covariates Entered in Separate Analyses |           |         |              |        |                     |         |               |        |                     |         |            |        |
| Compassionate Love                      | .07       | .08     | [-.04, .19]  | .207   | -.46                | -.11    | [-.92, .00]   | .051   | .51                 | .45     | [.36, .66] | < .001 |
| Communal Orientation                    | .35       | .27     | [.19, .50]   | < .001 | -.43                | -.10    | [-.87, .02]   | .060   | .40                 | .36     | [.27, .54] | < .001 |
| Communion                               | .32       | .28     | [.19, .45]   | < .001 | -.56                | -.13    | [-1.01, -.12] | .013   | .41                 | .37     | [.28, .54] | < .001 |
| Unmitigated Communion                   | .04       | .04     | [-.08, .16]  | > .250 | -.45                | -.10    | [-.92, .01]   | .055   | .55                 | .49     | [.41, .68] | < .001 |
| Empathic Concern                        | .23       | .24     | [.12, .34]   | < .001 | -.56                | -.13    | [-1.01, -.11] | .015   | .43                 | .39     | [.30, .57] | < .001 |
| Covariates Entered in a Single Analysis |           |         |              |        |                     |         |               |        |                     |         |            |        |
| Compassionate Love                      | -.10      | -.11    | [-.24, .04]  | .149   |                     |         |               |        |                     |         |            |        |
| Communal Orientation                    | .21       | .16     | [.02, .40]   | .031   |                     |         |               |        |                     |         |            |        |
| Communion                               | .24       | .21     | [.08, .40]   | .003   |                     |         |               |        |                     |         |            |        |
| Unmitigated Communion                   | -.11      | -.10    | [-.24, .03]  | .111   |                     |         |               |        |                     |         |            |        |
| Empathic Concern                        | .14       | .15     | [-.01, .29]  | .059   |                     |         |               |        |                     |         |            |        |
| Social Desirability                     | -.53      | -.12    | [-.97, -.08] | .021   |                     |         |               |        |                     |         |            |        |
| Compassionate Goals                     | .40       | .36     | [.26, .55]   | < .001 |                     |         |               |        |                     |         |            |        |
| <u>DV: Responsiveness</u>               |           |         |              |        |                     |         |               |        |                     |         |            |        |
| Covariates Entered in Separate Analyses |           |         |              |        |                     |         |               |        |                     |         |            |        |
| Compassionate Love                      | .21       | .26     | [.12, .31]   | < .001 | .21                 | .05     | [-.18, .61]   | > .250 | .44                 | .42     | [.31, .56] | < .001 |
| Communal Orientation                    | .43       | .35     | [.30, .56]   | < .001 | .31                 | .08     | [-.07, .68]   | .108   | .10                 | .38     | [.29, .51] | < .001 |
| Communion                               | .45       | .42     | [.34, .56]   | < .001 | .10                 | .03     | [-.26, .47]   | > .250 | .39                 | .37     | [.28, .49] | < .001 |
| Unmitigated Communion                   | .12       | .12     | [.01, .22]   | .030   | .22                 | .06     | [-.18, .63]   | > .250 | .54                 | .51     | [.43, .66] | < .001 |
| Empathic Concern                        | .30       | .33     | [.21, .39]   | < .001 | .12                 | .03     | [-.27, .50]   | > .250 | .43                 | .41     | [.32, .54] | < .001 |
| Covariates Entered in a Single Analysis |           |         |              |        |                     |         |               |        |                     |         |            |        |
| Compassionate Love                      | .03       | .04     | [-.08, .14]  | > .250 |                     |         |               |        |                     |         |            |        |
| Communal Orientation                    | .19       | .16     | [.04, .34]   | .014   |                     |         |               |        |                     |         |            |        |
| Communion                               | .34       | .32     | [.21, .47]   | < .001 |                     |         |               |        |                     |         |            |        |
| Unmitigated Communion                   | -.10      | -.10    | [-.20, .01]  | .072   |                     |         |               |        |                     |         |            |        |
| Empathic Concern                        | .10       | .11     | [-.02, .22]  | .106   |                     |         |               |        |                     |         |            |        |
| Social Desirability                     | .16       | .04     | [-.20, .51]  | > .250 |                     |         |               |        |                     |         |            |        |

|                     |     |     |            |       |
|---------------------|-----|-----|------------|-------|
| Compassionate Goals | .32 | .30 | [.20, .44] | <.001 |
|---------------------|-----|-----|------------|-------|

N = 318 for all analyses

Supplemental Table 4.

## Study 2 Regression Analyses Predicting Social Support Given and Responsiveness to Close Others, Controlling for Gender

|                                         | Covariate |         |              |        | Gender |         |             |      | Compassionate Goals |         |            |        |
|-----------------------------------------|-----------|---------|--------------|--------|--------|---------|-------------|------|---------------------|---------|------------|--------|
|                                         | b         | $\beta$ | 95%CI        | p      | b      | $\beta$ | 95%CI       | p    | b                   | $\beta$ | 95%CI      | p      |
| <u>DV: Social Support Given</u>         |           |         |              |        |        |         |             |      |                     |         |            |        |
| Covariates Entered in Separate Analyses |           |         |              |        |        |         |             |      |                     |         |            |        |
| Compassionate Love                      | .07       | .08     | [-.04, .18]  | .323   | .06    | .05     | [-.08, .19] | .392 | .47                 | .41     | [.32, .61] | < .001 |
| Communal Orientation                    | .35       | .27     | [.20, .50]   | < .001 | .01    | .01     | [-.12, .14] | .889 | .37                 | .32     | [.23, .50] | < .001 |
| Communion                               | .31       | .27     | [.18, .43]   | < .001 | .01    | .01     | [-.12, .15] | .833 | .38                 | .34     | [.25, .51] | < .001 |
| Unmitigated Communion                   | .01       | .01     | [-.11, .13]  | .872   | .07    | .05     | [-.07, .20] | .322 | .51                 | .45     | [.38, .65] | < .001 |
| Empathic Concern                        | .21       | .22     | [.10, .32]   | < .001 | .01    | .01     | [-.13, .14] | .901 | .41                 | .36     | [.28, .54] | < .001 |
| Covariates Entered in a Single Analysis |           |         |              |        |        |         |             |      |                     |         |            |        |
| Compassionate Love                      | -.10      | -.11    | [-.24, .04]  | .164   |        |         |             |      |                     |         |            |        |
| Communal Orientation                    | .24       | .19     | [.05, .43]   | .012   |        |         |             |      |                     |         |            |        |
| Communion                               | .24       | .21     | [.08, .39]   | .003   |        |         |             |      |                     |         |            |        |
| Unmitigated Communion                   | -.14      | -.14    | [-.27, -.01] | .037   |        |         |             |      |                     |         |            |        |
| Empathic Concern                        | .13       | .13     | [-.02, .27]  | .009   |        |         |             |      |                     |         |            |        |
| Gender                                  | -.03      | -.02    | [-.16, .10]  | .645   |        |         |             |      |                     |         |            |        |
| Compassionate Goals                     | .38       | .34     | [.24, .53]   | < .001 |        |         |             |      |                     |         |            |        |
| <u>DV: Responsiveness</u>               |           |         |              |        |        |         |             |      |                     |         |            |        |
| Covariates Entered in Separate Analyses |           |         |              |        |        |         |             |      |                     |         |            |        |
| Compassionate Love                      | .23       | .28     | [.14, .33]   | < .001 | .06    | .05     | [-.05, .18] | .272 | .43                 | .40     | [.30, .55] | < .001 |
| Communal Orientation                    | .46       | .38     | [.33, .59]   | < .001 | .01    | .01     | [-.10, .12] | .848 | .40                 | .37     | [.29, .51] | < .001 |
| Communion                               | .46       | .44     | [.36, .57]   | < .001 | .01    | .01     | [-.10, .12] | .845 | .39                 | .36     | [.28, .49] | < .001 |
| Unmitigated Communion                   | .13       | .14     | [.03, .23]   | .013   | .09    | .07     | [-.03, .20] | .141 | .53                 | .50     | [.41, .64] | < .001 |
| Empathic Concern                        | .31       | .35     | [.22, .41]   | < .001 | .01    | .00     | [-.11, .12] | .929 | .43                 | .41     | [.32, .54] | < .001 |
| Covariates Entered in a Single Analysis |           |         |              |        |        |         |             |      |                     |         |            |        |
| Compassionate Love                      | .03       | .04     | [-.08, .14]  | .569   |        |         |             |      |                     |         |            |        |
| Communal Orientation                    | .21       | .17     | [.06, .36]   | .006   |        |         |             |      |                     |         |            |        |
| Communion                               | .35       | .33     | [.22, .47]   | < .001 |        |         |             |      |                     |         |            |        |
| Unmitigated Communion                   | -.09      | -.09    | [-.19, .01]  | .088   |        |         |             |      |                     |         |            |        |
| Empathic Concern                        | .10       | .11     | [-.02, .21]  | .1065  |        |         |             |      |                     |         |            |        |
| Gender                                  | -.04      | -.03    | [-.14, .07]  | .470   |        |         |             |      |                     |         |            |        |

|                     |     |     |            |        |
|---------------------|-----|-----|------------|--------|
| Compassionate Goals | .32 | .30 | [.21, .43] | < .001 |
|---------------------|-----|-----|------------|--------|

N = 318 for all analyses

Supplemental Table 5.

## Study 3 Analyses Predicting Other-Focused Reasons for Giving and Gratitude, Controlling for Gender

|                                             | <i>b</i> | 95%CI       | <i>pr</i> | <i>p</i> |
|---------------------------------------------|----------|-------------|-----------|----------|
| <u>DV: Other-Focused Reasons for Giving</u> |          |             |           |          |
| Covariates Entered in Separate Analyses     |          |             |           |          |
| Self-Focused Reasons for Giving             | .16      | [.07, .24]  | .25       | < .001   |
| Compassionate Love                          | .07      | [-.07, .20] | .07       | .337     |
| Gender                                      | .33      | [.12, .54]  | .31       | .002     |
| Compassionate Goals                         | .38      | [.18, .57]  | .27       | < .001   |
| Self-Focused Reasons for Giving             | .15      | [.07, .24]  | .24       | .001     |
| Communal Orientation                        | -.03     | [-.20, .14] | -.03      | .706     |
| Gender                                      | .32      | [.11, .54]  | .30       | .004     |
| Compassionate Goals                         | .44      | [.28, .61]  | .36       | < .001   |
| Self-Focused Reasons for Giving             | .16      | [.07, .24]  | .14       | < .001   |
| Communion                                   | -.03     | [-.20, .15] | -.04      | .776     |
| Gender                                      | .32      | [.11, .54]  | .18       | .003     |
| Compassionate Goals                         | .45      | [.27, .62]  | .34       | < .001   |
| Self-Focused Reasons for Giving             | .16      | [.07, .24]  | .25       | < .001   |
| Unmitigated Communion                       | .08      | [-.06, .23] | .08       | .259     |
| Gender                                      | .32      | [.12, .53]  | .30       | .003     |
| Compassionate Goals                         | .39      | [.22, .56]  | .31       | < .001   |
| Self-Focused Reasons for Giving             | .17      | [.08, .25]  | .27       | < .001   |
| Empathic Concern                            | .12      | [-.04, .28] | .11       | .130     |
| Gender                                      | .31      | [.10, .51]  | .29       | .004     |
| Compassionate Goals                         | .37      | [.20, .55]  | .29       | < .001   |
| Covariates Entered in a Single Analysis     |          |             |           |          |
| Self-Focused Reasons for Giving             | .15      | [.06, .24]  | .24       | .001     |
| Compassionate Love                          | .03      | [-.13, .18] | .03       | .709     |
| Communal Orientation                        | -.09     | [-.28, .10] | -.07      | .347     |
| Communion                                   | -.13     | [-.34, .09] | -.09      | .244     |
| Unmitigated Communion                       | .09      | [-.08, .26] | .08       | .312     |
| Empathic Concern                            | .16      | [-.04, .36] | .11       | .115     |
| Gender                                      | .32      | [.10, .54]  | .30       | .004     |
| Compassionate Goals                         | .36      | [.16, .57]  | .25       | .001     |
| <u>DV: Gratitude</u>                        |          |             |           |          |
| Covariates Entered in Separate Analyses     |          |             |           |          |
| Compassionate Love                          | .05      | [-.07, .17] | .06       | .438     |
| Gender                                      | .33      | [.13, .52]  | .32       | .001     |
| Compassionate Goals                         | .38      | [.21, .55]  | .30       | < .001   |
| Communal Orientation                        | .02      | [-.13, .16] | .02       | .823     |
| Gender                                      | .29      | [.09, .48]  | .28       | .004     |
| Compassionate Goals                         | .41      | [.27, .55]  | .39       | < .001   |



---

|                                         |      |             |      |        |
|-----------------------------------------|------|-------------|------|--------|
| Communion                               | .22  | [.07, .36]  | .22  | .004   |
| Gender                                  | .31  | [.12, .50]  | .31  | .002   |
| Compassionate Goals                     | .31  | [.16, .46]  | .28  | < .001 |
| Unmitigated Communion                   | -.04 | [-.17, .09] | -.05 | .530   |
| Gender                                  | .32  | [.13, .51]  | .32  | .001   |
| Compassionate Goals                     | .44  | [.29, .59]  | .39  | < .001 |
| Empathic Concern                        | .13  | [-.01, .26] | .13  | .065   |
| Gender                                  | .30  | [.12, .49]  | .31  | .002   |
| Compassionate Goals                     | .35  | [.20, .50]  | .31  | < .001 |
| Covariates Entered in a Single Analysis |      |             |      |        |
| Compassionate Love                      | .02  | [-.11, .15] | .03  | .734   |
| Communal Orientation                    | -.09 | [-.25, .07] | .09  | .248   |
| Communion                               | .24  | [.07, .42]  | .22  | .007   |
| Unmitigated Communion                   | -.10 | [-.24, .04] | -.11 | .149   |
| Empathic Concern                        | .09  | [-.08, .25] | .07  | .320   |
| Gender                                  | .28  | [.09, .47]  | .28  | .004   |
| Compassionate Goals                     | .31  | [.14, .48]  | .25  | .001   |

---

#### Supplement to Section 4.2.4 Compassionate Goals, Other-Focused Reasons for Giving, and Friend's Gratitude.

We tested the path model in which participants' compassionate goals indirectly predicted friends' gratitude through participants' other-focused reasons for giving, controlling for the other measures of prosocial orientations. When we regressed participants' other-focused reasons for giving on their compassionate goals, controlling for their self-focused reasons for giving, compassionate love, communal orientation, communion, unmitigated communion, and empathic concern, participants' compassionate goals predicted their greater other-focused reasons for giving,  $b = .38$ ,  $SE = .11$ ,  $t(188.82) = 3.55$ , 95% CI [.17, .58],  $p < .001$ ,  $pr = .25$ . Full results from this analysis appears in the bottom right section of Table 7 in the manuscript. When we regressed friends' gratitude on participants' other-focused reasons for giving and compassionate goals controlling for their self-focused reasons for giving, compassionate love, communal orientation, communion, unmitigated communion, and empathic concern, participants' friend-centered reasons for giving predicted friends' gratitude,  $b = .28$ ,  $SE = .07$ ,  $t(182.54) = 4.15$ , 95% CI [.15, .41],  $p < .001$ ,  $pr = .29$ . (Full results from this analysis appear in Table 3 below). The 95% confidence interval for the indirect effect did not include zero, 95% CI [.04, .20], again, indicating a significant indirect effect of compassionate goals on friends' gratitude through participants' other-focused reasons for giving, when we controlled for other measures of prosocial orientation.

Table 6

Study 3 Supplemental Analyses Examining Participants' Other-Focused Reasons for Giving, Controlling for Participants' Compassionate Goals, Self-Focused Reasons for Giving, and Other Measures of Prosocial Orientations.

|                                  | Outcome: Friends' Gratitude |             |           |          |
|----------------------------------|-----------------------------|-------------|-----------|----------|
|                                  | <i>b</i>                    | 95%CI       | <i>pr</i> | <i>p</i> |
| Participants':                   |                             |             |           |          |
| Self-Focused Reasons for Giving  | -.00                        | [-.09, .08] | -.01      | >.250    |
| Compassionate Love               | -.13                        | [-.27, .02] | -.13      | .081     |
| Communal Orientation             | .13                         | [-.05, .32] | .11       | .144     |
| Communion                        | -.06                        | [-.27, .15] | -.05      | >.250    |
| Unmitigated Communion            | -.04                        | [-.21, .12] | -.04      | >.250    |
| Empathic Concern                 | .19                         | [-.00, .38] | .15       | .050     |
| Compassionate Goals              | .04                         | [-.16, .24] | .03       | >.250    |
| Other-Focused Reasons for Giving | .28                         | [.15, .41]  | .29       | <.001    |

## ALL OF THE FOLLOWING MEASURES WERE INCLUDED IN ALL STUDIES

### Compassionate and Self-Image Goals

| In general, how much do you <i>want</i> or <i>try</i> to: |                                                                    | Not at All | A little | Somewhat | A lot | Extremely |
|-----------------------------------------------------------|--------------------------------------------------------------------|------------|----------|----------|-------|-----------|
| 1.                                                        | avoid appearing ignorant, incompetent, or unintelligent            | 1          | 2        | 3        | 4     | 5         |
| 2.                                                        | be constructive in your comments to others                         | 1          | 2        | 3        | 4     | 5         |
| 3.                                                        | get others to notice your positive qualities                       | 1          | 2        | 3        | 4     | 5         |
| 4.                                                        | avoid doing anything that would be harmful to others               | 1          | 2        | 3        | 4     | 5         |
| 5.                                                        | give the appearance of being on top of things.                     | 1          | 2        | 3        | 4     | 5         |
| 6.                                                        | appear helpful.                                                    | 1          | 2        | 3        | 4     | 5         |
| 7.                                                        | avoid being criticized by others                                   | 1          | 2        | 3        | 4     | 5         |
| 8.                                                        | avoid being selfish or self-centered                               | 1          | 2        | 3        | 4     | 5         |
| 9.                                                        | have compassion for others' mistakes and weaknesses                | 1          | 2        | 3        | 4     | 5         |
| 10.                                                       | avoid appearing unlikable                                          | 1          | 2        | 3        | 4     | 5         |
| 11.                                                       | understand how your actions affect others                          | 1          | 2        | 3        | 4     | 5         |
| 12.                                                       | avoid focusing on your own needs to the exclusion of others' needs | 1          | 2        | 3        | 4     | 5         |
| 13.                                                       | get others to recognize or acknowledge your intelligence           | 1          | 2        | 3        | 4     | 5         |
| 14.                                                       | be supportive of others                                            | 1          | 2        | 3        | 4     | 5         |
| 15.                                                       | avoid doing things that aren't helpful to you or others            | 1          | 2        | 3        | 4     | 5         |
| 16.                                                       | convince others that you are right                                 | 1          | 2        | 3        | 4     | 5         |
| 17.                                                       | make a positive difference in someone else's life                  | 1          | 2        | 3        | 4     | 5         |
| 18.                                                       | avoid taking risks or making mistakes                              | 1          | 2        | 3        | 4     | 5         |
| 19.                                                       | do things that are helpful for both you and others.                | 1          | 2        | 3        | 4     | 5         |
| 20.                                                       | avoid being wrong                                                  | 1          | 2        | 3        | 4     | 5         |
| 21.                                                       | do things you knew you could succeed at                            | 1          | 2        | 3        | 4     | 5         |
| 22.                                                       | avoid neglecting your relationship with others                     | 1          | 2        | 3        | 4     | 5         |
| 23.                                                       | avoid showing your weaknesses                                      | 1          | 2        | 3        | 4     | 5         |
| 24.                                                       | avoid shutting people off emotionally                              | 1          | 2        | 3        | 4     | 5         |

### Compassionate Love

| Please rate the following items: |                                                                                  | Not at All True of Me |   |   |   | Very True of Me |
|----------------------------------|----------------------------------------------------------------------------------|-----------------------|---|---|---|-----------------|
| 1.                               | When I see people I do not know feeling sad, I feel a need to reach out to them. | 1                     | 2 | 3 | 4 | 5               |
| 2.                               | I spend a lot of time concerned about the well-being of humankind.               | 1                     | 2 | 3 | 4 | 5               |

|     |                                                                                                                                          |   |   |   |   |   |
|-----|------------------------------------------------------------------------------------------------------------------------------------------|---|---|---|---|---|
| 3.  | When I hear about someone (a stranger) going through a difficult time, I feel a great deal of compassion for him or her.                 | 1 | 2 | 3 | 4 | 5 |
| 4.  | It is easy for me to feel the pain (and joy) experienced by others, even though I do not know them.                                      | 1 | 2 | 3 | 4 | 5 |
| 5.  | If I encounter a stranger who needs help, I would do almost anything I could to help him or her.                                         | 1 | 2 | 3 | 4 | 5 |
| 6.  | I feel considerable compassionate love for people from everywhere.                                                                       | 1 | 2 | 3 | 4 | 5 |
| 7.  | I would rather suffer myself than see someone else (a stranger) suffer.                                                                  | 1 | 2 | 3 | 4 | 5 |
| 8.  | If given the opportunity, I am willing to sacrifice in order to let people from other places who are less fortunate achieve their goals. | 1 | 2 | 3 | 4 | 5 |
| 9.  | I tend to feel compassion for people, even though I do not know them.                                                                    | 1 | 2 | 3 | 4 | 5 |
| 10. | One of the activities that provides me with the most meaning in my life is helping others in the world when they need help.              | 1 | 2 | 3 | 4 | 5 |
| 11. | I would rather engage in actions that help others, even though they are strangers, than engage in actions that would help me.            | 1 | 2 | 3 | 4 | 5 |
| 12. | I often have tender feelings toward people (strangers) when they seem to be in need.                                                     | 1 | 2 | 3 | 4 | 5 |
| 13. | I feel a selfless caring for most of humankind.                                                                                          | 1 | 2 | 3 | 4 | 5 |
| 14. | I accept others whom I do not know even when they do things I think are wrong.                                                           | 1 | 2 | 3 | 4 | 5 |
| 15. | If a person (a stranger) is troubled, I usually feel extreme tenderness and caring.                                                      | 1 | 2 | 3 | 4 | 5 |
| 16. | I try to understand rather than judge people who are strangers to me.                                                                    | 1 | 2 | 3 | 4 | 5 |
| 17. | I try to put myself in a stranger's shoes when he or she is in trouble.                                                                  | 1 | 2 | 3 | 4 | 5 |
| 18. | I feel happy when I see that others (strangers) are happy.                                                                               | 1 | 2 | 3 | 4 | 5 |
| 19. | Those whom I encounter through my work and public life can assume that I will be there if they need me.                                  | 1 | 2 | 3 | 4 | 5 |
| 20. | I want to spend time with people I don't know well so that I can find ways to help enrich their lives.                                   | 1 | 2 | 3 | 4 | 5 |
| 21. | I very much wish to be kind and good to fellow human beings.                                                                             | 1 | 2 | 3 | 4 | 5 |

### Communal Orientation Scale

| Please rate how characteristic each item is of you, using the scale provided. |                                                                                       | Extremely Uncharacteristic |   |   |   | Extremely Characteristic |
|-------------------------------------------------------------------------------|---------------------------------------------------------------------------------------|----------------------------|---|---|---|--------------------------|
| 1.                                                                            | It bothers me when other people neglect my needs.                                     | 1                          | 2 | 3 | 4 | 5                        |
| 2.                                                                            | When making a decision, I take other people's needs and feelings into account.        | 1                          | 2 | 3 | 4 | 5                        |
| 3.                                                                            | I'm not especially sensitive to other people's feelings.                              | 1                          | 2 | 3 | 4 | 5                        |
| 4.                                                                            | I don't consider myself to be a particularly helpful person.                          | 1                          | 2 | 3 | 4 | 5                        |
| 5.                                                                            | I believe people should go out of their way to be helpful.                            | 1                          | 2 | 3 | 4 | 5                        |
| 6.                                                                            | I don't especially enjoy giving others aid.                                           | 1                          | 2 | 3 | 4 | 5                        |
| 7.                                                                            | I expect people I know to be responsive to my needs and feelings.                     | 1                          | 2 | 3 | 4 | 5                        |
| 8.                                                                            | I often go out of my way to help another person.                                      | 1                          | 2 | 3 | 4 | 5                        |
| 9.                                                                            | I believe it's best not to get involved taking care of other people's personal needs. | 1                          | 2 | 3 | 4 | 5                        |
| 10.                                                                           | I'm not the sort of person who often comes to the aid of others.                      | 1                          | 2 | 3 | 4 | 5                        |
| 11.                                                                           | When I have a need, I turn to others I know for help.                                 | 1                          | 2 | 3 | 4 | 5                        |
| 12.                                                                           | When people get emotionally upset, I tend to avoid them.                              | 1                          | 2 | 3 | 4 | 5                        |
| 13.                                                                           | People should keep their troubles to themselves.                                      | 1                          | 2 | 3 | 4 | 5                        |
| 14.                                                                           | When I have a need that others' ignore, I'm hurt.                                     | 1                          | 2 | 3 | 4 | 5                        |

### AGENCY AND COMMUNION

**INSTRUCTIONS:** The items below consist of a pair of contradictory characteristics--that is, you cannot be both at the same time. The numbers form a scale between the two extremes. You are to circle the number that describes where you fall on the scale.

|                                               |   |   |   |   |   |                                          |
|-----------------------------------------------|---|---|---|---|---|------------------------------------------|
| Not at all arrogant                           | 1 | 2 | 3 | 4 | 5 | Very arrogant                            |
| Not at all independent                        | 1 | 2 | 3 | 4 | 5 | Very independent                         |
| Not at all emotional                          | 1 | 2 | 3 | 4 | 5 | Very emotional                           |
| Looks out for self                            | 1 | 2 | 3 | 4 | 5 | Looks out for others                     |
| Very passive                                  | 1 | 2 | 3 | 4 | 5 | Very active                              |
| Not at all egotistical                        | 1 | 2 | 3 | 4 | 5 | Very egotistical                         |
| Difficult to devote self completely to others | 1 | 2 | 3 | 4 | 5 | Easy to devote self completely to others |
| Very rough                                    | 1 | 2 | 3 | 4 | 5 | Very gentle                              |

|                                      |   |   |   |   |   |                                    |
|--------------------------------------|---|---|---|---|---|------------------------------------|
| Not at all helpful to others         | 1 | 2 | 3 | 4 | 5 | Very helpful to others             |
| Not at all boastful                  | 1 | 2 | 3 | 4 | 5 | Very boastful                      |
| Not at all competitive               | 1 | 2 | 3 | 4 | 5 | Very competitive                   |
| Not at all kind                      | 1 | 2 | 3 | 4 | 5 | Very kind                          |
| Not at all aware of others' feelings | 1 | 2 | 3 | 4 | 5 | Very aware of others' feelings     |
| Can make decisions easily            | 1 | 2 | 3 | 4 | 5 | Has difficulty making decisions    |
| Not at all greedy                    | 1 | 2 | 3 | 4 | 5 | Very greedy                        |
| Gives up easily                      | 1 | 2 | 3 | 4 | 5 | Never gives up                     |
| Not at all self-confident            | 1 | 2 | 3 | 4 | 5 | Very self-confident                |
| Feels very inferior                  | 1 | 2 | 3 | 4 | 5 | Feels very superior                |
| Not at all dictatorial               | 1 | 2 | 3 | 4 | 5 | Very dictatorial                   |
| Not at all understanding of others   | 1 | 2 | 3 | 4 | 5 | Very understanding of others       |
| Not at all cynical                   | 1 | 2 | 3 | 4 | 5 | Very cynical                       |
| Very cold in relations with others   | 1 | 2 | 3 | 4 | 5 | Very warm in relations with others |
| Not at all hostile                   | 1 | 2 | 3 | 4 | 5 | Very hostile                       |
| Goes to pieces under pressure        | 1 | 2 | 3 | 4 | 5 | Stands up well under pressure      |

### Unmitigated Communion Scale

**INSTRUCTIONS:** Read each item carefully. Using the scale, choose the number that best describes you.

|    |                                                                                               | Strongly Disagree | Slightly Disagree | Neither Agree nor Disagree | Slightly Agree | Strongly Agree |
|----|-----------------------------------------------------------------------------------------------|-------------------|-------------------|----------------------------|----------------|----------------|
| 1. | I <i>always</i> place the needs of others above my own.                                       | 1                 | 2                 | 3                          | 4              | 5              |
| 2. | I never find myself getting overly involved in others' problems.                              | 1                 | 2                 | 3                          | 4              | 5              |
| 3. | For me to be happy, I need others to be happy.                                                | 1                 | 2                 | 3                          | 4              | 5              |
| 4. | I worry about how other people get along without me when I am not there.                      | 1                 | 2                 | 3                          | 4              | 5              |
| 5. | I have <i>no</i> trouble getting to sleep at night when other people are upset.               | 1                 | 2                 | 3                          | 4              | 5              |
| 6. | It is impossible for me to satisfy my own needs when they interfere with the needs of others. | 1                 | 2                 | 3                          | 4              | 5              |
| 7. | I can't say no when someone asks for help.                                                    | 1                 | 2                 | 3                          | 4              | 5              |
| 8. | Even when I am exhausted, I will always help other people.                                    | 1                 | 2                 | 3                          | 4              | 5              |
| 9. | I often worry about others' problems.                                                         | 1                 | 2                 | 3                          | 4              | 5              |

### Empathic Concern

**INSTRUCTIONS:** The following statements inquire about your thoughts and feelings in a variety of situations. For each item, indicate how well it describes you by choosing the appropriate number. READ EACH ITEM CAREFULLY BEFORE RESPONDING. Answer as honestly as you can.

|    |                                                                                            | Does not<br>describe<br>me well |   |   |   | Describes<br>me very<br>well |
|----|--------------------------------------------------------------------------------------------|---------------------------------|---|---|---|------------------------------|
| 1. | I often have tender, concerned feelings for people less fortunate than me.                 | 1                               | 2 | 3 | 4 | 5                            |
| 2. | Sometimes I don't feel very sorry for other people when they are having problems.          | 1                               | 2 | 3 | 4 | 5                            |
| 3. | When I see someone being taken advantage of, I feel kind of protective towards them.       | 1                               | 2 | 3 | 4 | 5                            |
| 4. | Other people's misfortunes do not usually disturb me a great deal.                         | 1                               | 2 | 3 | 4 | 5                            |
| 5. | When I see someone being treated unfairly, I sometimes don't feel very much pity for them. | 1                               | 2 | 3 | 4 | 5                            |
| 6. | I am often quite touched by things that I see happen.                                      | 1                               | 2 | 3 | 4 | 5                            |
| 7. | I would describe myself as a pretty soft-hearted person.                                   | 1                               | 2 | 3 | 4 | 5                            |

### Social Desirability (Included in Studies 1 and 2 only)

| <b>INSTRUCTIONS:</b> Listed below are a number of statements concerning personal attitudes and traits. Read each item and decide whether the statement is true (T) or false (F) as it pertains to you personally. It's best to go with your first judgment and not spend too long mulling over any one question. |                                                                                               | True | False |
|------------------------------------------------------------------------------------------------------------------------------------------------------------------------------------------------------------------------------------------------------------------------------------------------------------------|-----------------------------------------------------------------------------------------------|------|-------|
| 1.                                                                                                                                                                                                                                                                                                               | Before voting, I thoroughly investigate the qualifications of the candidates                  |      |       |
| 2.                                                                                                                                                                                                                                                                                                               | I never hesitate to go out of my way to help someone in trouble.                              |      |       |
| 3.                                                                                                                                                                                                                                                                                                               | It is sometimes hard for me to go on with my work if I am not encouraged.                     |      |       |
| 4.                                                                                                                                                                                                                                                                                                               | I have never intensely disliked anyone.                                                       |      |       |
| 5.                                                                                                                                                                                                                                                                                                               | On occasions I have had doubts about my ability to succeed in life.                           |      |       |
| 6.                                                                                                                                                                                                                                                                                                               | I sometimes feel resentful when I don't get my way.                                           |      |       |
| 7.                                                                                                                                                                                                                                                                                                               | I am always careful about my manner of dress.                                                 |      |       |
| 8.                                                                                                                                                                                                                                                                                                               | My table manners at home are as good as when I eat out in a restaurant.                       |      |       |
| 9.                                                                                                                                                                                                                                                                                                               | If I could get into a movie without paying and be sure I was not seen I would probably do it. |      |       |
| 10.                                                                                                                                                                                                                                                                                                              | On a few occasions, I have given something up because I thought too little of my ability.     |      |       |
| 11.                                                                                                                                                                                                                                                                                                              | I like to gossip at times.                                                                    |      |       |

|     |                                                                                                                  |  |  |
|-----|------------------------------------------------------------------------------------------------------------------|--|--|
| 12. | There have been times when I felt like rebelling against people in authority even though I knew they were right. |  |  |
| 13. | No matter who I'm talking to, I'm always a good listener.                                                        |  |  |
| 14. | I can remember "playing sick" to get out of something.                                                           |  |  |
| 15. | There have been occasions when I have taken advantage of someone.                                                |  |  |
| 16. | I'm always willing to admit it when I make a mistake.                                                            |  |  |
| 17. | I always try to practice what I preach.                                                                          |  |  |
| 18. | I don't find it particularly difficulty to get along with loudmouthed, obnoxious people.                         |  |  |
| 19. | I sometimes try to get even rather than forgive and forget.                                                      |  |  |
| 20. | When I don't know something I don't mind at all admitting it.                                                    |  |  |
| 21. | I am always courteous, even to people who are disagreeable.                                                      |  |  |
| 22. | At times I have really insisted on having things my own way.                                                     |  |  |
| 23. | There have been occasions when I felt like smashing things.                                                      |  |  |
| 24. | I would never think of letting someone else be punished for my wrong-doings.                                     |  |  |
| 25. | I never resent being asked to return a favor.                                                                    |  |  |
| 26. | I have never been irked when people express ideas very different from my own.                                    |  |  |
| 27. | I never make a long trip without checking the safety of my car.                                                  |  |  |
| 28. | There have been times when I was quite jealous of the good fortune of others.                                    |  |  |
| 29. | I have almost never felt the urge to tell someone off.                                                           |  |  |
| 30. | I am sometimes irritated by people who ask favors of me.                                                         |  |  |
| 31. | I have never felt that I was punished without cause.                                                             |  |  |
| 32. | I sometimes think when people have a misfortune they only got what they deserved.                                |  |  |
| 33. | I have never deliberately said something that hurt someone's feelings.                                           |  |  |

### BACKGROUND INFORMATION

**The following items ask about you and your context to help us interpret the results of the survey.**

1. Your Gender: \_\_\_\_\_Male \_\_\_\_\_Female
2. Your Race (check all that apply):  
 \_\_\_\_\_ American Indian/Alaska Native \_\_\_\_\_Black or African American  
 \_\_\_\_\_Asian \_\_\_\_\_Caucasian/White  
 \_\_\_\_\_Native Hawaiian or other pacific islander \_\_\_\_\_Other
3. Your ethnicity  
 \_\_\_\_\_Hispanic/Latino (any race)  
 \_\_\_\_\_Not Hispanic/Latino
4. Your Age: \_\_\_\_\_



**INCLUDED IN STUDY 1 ONLY****Altruism Scale**

| <b>Please rate how often you do each of the following.</b> |                                                                                                                                   | <b>Never</b> |   |   |   | <b>Very Often</b> |
|------------------------------------------------------------|-----------------------------------------------------------------------------------------------------------------------------------|--------------|---|---|---|-------------------|
| 1.                                                         | I have helped push a stranger's car out of the snow.                                                                              | 1            | 2 | 3 | 4 | 5                 |
| 2.                                                         | I have given directions to a stranger.                                                                                            | 1            | 2 | 3 | 4 | 5                 |
| 3.                                                         | I have made change for a stranger.                                                                                                | 1            | 2 | 3 | 4 | 5                 |
| 4.                                                         | I have given money to a charity.                                                                                                  | 1            | 2 | 3 | 4 | 5                 |
| 5.                                                         | I have given money to a stranger who needed it (or asked me for it).                                                              | 1            | 2 | 3 | 4 | 5                 |
| 6.                                                         | I have donated goods or clothes to a charity.                                                                                     | 1            | 2 | 3 | 4 | 5                 |
| 7.                                                         | I have done volunteer work for a charity.                                                                                         | 1            | 2 | 3 | 4 | 5                 |
| 8.                                                         | I have donated blood.                                                                                                             | 1            | 2 | 3 | 4 | 5                 |
| 9.                                                         | I have helped carry a stranger's belongings (books, parcels, etc.)                                                                | 1            | 2 | 3 | 4 | 5                 |
| 10.                                                        | I have delayed an elevator and held the door open for a stranger.                                                                 | 1            | 2 | 3 | 4 | 5                 |
| 11.                                                        | I have allowed someone to go ahead of me in a line (at a copy machine, in the supermarket, etc).                                  | 1            | 2 | 3 | 4 | 5                 |
| 12.                                                        | I have given a stranger a lift in my car.                                                                                         | 1            | 2 | 3 | 4 | 5                 |
| 13.                                                        | I have pointed out a clerk's error (in a bank, at the supermarket) in undercharging me for an item.                               | 1            | 2 | 3 | 4 | 5                 |
| 14.                                                        | I have let a neighbor whom I didn't know too well borrow an item of some value to me (e.g., a dish, tools, etc).                  | 1            | 2 | 3 | 4 | 5                 |
| 15.                                                        | I have bought "charity" Christmas cards deliberately because I knew it as a good cause.                                           | 1            | 2 | 3 | 4 | 5                 |
| 16.                                                        | I have helped a classmate who I did not know that well with a homework assignment when my knowledge was greater than his or hers. | 1            | 2 | 3 | 4 | 5                 |
| 17.                                                        | I have before being asked, voluntarily looked after a neighbor's pets or children without being paid for it.                      | 1            | 2 | 3 | 4 | 5                 |
| 18.                                                        | I have offered to help a handicapped or elderly stranger across a street.                                                         | 1            | 2 | 3 | 4 | 5                 |
| 19.                                                        | I have offered my seat on a bus or train to a stranger who was standing.                                                          | 1            | 2 | 3 | 4 | 5                 |
| 20.                                                        | I have helped an acquaintance to move households.                                                                                 | 1            | 2 | 3 | 4 | 5                 |

**INCLUDED IN STUDY 2 ONLY****Social Support Made Available to Others**

|     |                                                                                       | <b>Very<br/>Strongly<br/>Disagree</b> |   |   |   | <b>Very<br/>Strongly<br/>Agree</b> |
|-----|---------------------------------------------------------------------------------------|---------------------------------------|---|---|---|------------------------------------|
| 1.  | I am around for a special person in my life when he/she is in need                    | 1                                     | 2 | 3 | 4 | 5                                  |
| 2.  | I am someone with whom a special person in my life can share his/her joys and sorrows | 1                                     | 2 | 3 | 4 | 5                                  |
| 3.  | I really try to help my family                                                        | 1                                     | 2 | 3 | 4 | 5                                  |
| 4.  | I provide emotional help and support to my family members                             | 1                                     | 2 | 3 | 4 | 5                                  |
| 5.  | I am a real source of comfort for the special person in my life                       | 1                                     | 2 | 3 | 4 | 5                                  |
| 6.  | I really try to help my friends                                                       | 1                                     | 2 | 3 | 4 | 5                                  |
| 7.  | My friends can count on me when things go wrong                                       | 1                                     | 2 | 3 | 4 | 5                                  |
| 8.  | My family members can talk about their problems with me                               | 1                                     | 2 | 3 | 4 | 5                                  |
| 9.  | My friends feel that I am someone with whom they can share their joys and sorrows     | 1                                     | 2 | 3 | 4 | 5                                  |
| 10. | There is a special person in my life who believes that I care about his/her feelings  | 1                                     | 2 | 3 | 4 | 5                                  |
| 11. | I am willing to help my family members make decisions                                 | 1                                     | 2 | 3 | 4 | 5                                  |
| 12. | My friends can talk about their problems with me                                      | 1                                     | 2 | 3 | 4 | 5                                  |

**Responsiveness to Others**

|     |                                                                   | <b>Not<br/>at all</b> |   |   |   | <b>Very<br/>much</b> |
|-----|-------------------------------------------------------------------|-----------------------|---|---|---|----------------------|
| 1.  | I do things to show others that I care about them                 | 1                     | 2 | 3 | 4 | 5                    |
| 2.  | I behave warmly toward others                                     | 1                     | 2 | 3 | 4 | 5                    |
| 3.  | I really listen to others when they speak                         | 1                     | 2 | 3 | 4 | 5                    |
| 4.  | I see things from others' points of view                          | 1                     | 2 | 3 | 4 | 5                    |
| 5.  | I make others feel comfortable about themselves and how they feel | 1                     | 2 | 3 | 4 | 5                    |
| 6.  | I am sensitive to others' feelings                                | 1                     | 2 | 3 | 4 | 5                    |
| 7.  | I am uncaring toward others                                       | 1                     | 2 | 3 | 4 | 5                    |
| 8.  | I show respect for others' capabilities and talents               | 1                     | 2 | 3 | 4 | 5                    |
| 9.  | I don't really take others' concerns seriously                    | 1                     | 2 | 3 | 4 | 5                    |
| 10. | I am sincere when I interact with others                          | 1                     | 2 | 3 | 4 | 5                    |
| 11. | I make others feel valued as people                               | 1                     | 2 | 3 | 4 | 5                    |
| 12. | I understand others' concerns                                     | 1                     | 2 | 3 | 4 | 5                    |

**INCLUDED IN STUDY 3 ONLY****Reasons for Giving**

Describe how you try to be helpful, generous, thoughtful, or supportive of \_\_\_\_\_. Include what you do, why you do it, and how often you do those things?

| Rate the importance of each of the following reasons for your decision to do things for _____.<br>(please write your friend's initials in the blank space above): |                                                                | Not at All Important |   |   |   | Extremely Important |
|-------------------------------------------------------------------------------------------------------------------------------------------------------------------|----------------------------------------------------------------|----------------------|---|---|---|---------------------|
| 1.                                                                                                                                                                | Because I care about _____.                                    | 1                    | 2 | 3 | 4 | 5                   |
| 2.                                                                                                                                                                | To avoid contributing to my friend's emotional distress.       | 1                    | 2 | 3 | 4 | 5                   |
| 3.                                                                                                                                                                | Because I thought it would make me feel better.                | 1                    | 2 | 3 | 4 | 5                   |
| 4.                                                                                                                                                                | To avoid feeling guilty.                                       | 1                    | 2 | 3 | 4 | 5                   |
| 5.                                                                                                                                                                | Because I thought it would be helpful or supportive for _____. | 1                    | 2 | 3 | 4 | 5                   |
| 6.                                                                                                                                                                | To avoid neglecting my friend's needs.                         | 1                    | 2 | 3 | 4 | 5                   |
| 7.                                                                                                                                                                | To avoid conflict in my friendship.                            | 1                    | 2 | 3 | 4 | 5                   |
| 8.                                                                                                                                                                | So _____ would appreciate or like me.                          | 1                    | 2 | 3 | 4 | 5                   |
| 9.                                                                                                                                                                | To improve _____'s life a little.                              | 1                    | 2 | 3 | 4 | 5                   |
| 10.                                                                                                                                                               | Because I did not want my friend to be hurt.                   | 1                    | 2 | 3 | 4 | 5                   |
| 11.                                                                                                                                                               | To prove to _____ that I am a good friend.                     | 1                    | 2 | 3 | 4 | 5                   |
| 12.                                                                                                                                                               | To prevent my friend from becoming upset.                      | 1                    | 2 | 3 | 4 | 5                   |
| 13.                                                                                                                                                               | Because _____ needed a friend.                                 | 1                    | 2 | 3 | 4 | 5                   |
| 14.                                                                                                                                                               | To prevent my friend from losing interest in me as a friend.   | 1                    | 2 | 3 | 4 | 5                   |
| 15.                                                                                                                                                               | To show _____ that I am a good person.                         | 1                    | 2 | 3 | 4 | 5                   |
| 16.                                                                                                                                                               | To prevent my friend from getting angry at me.                 | 1                    | 2 | 3 | 4 | 5                   |

### Gratitude toward Partner

Describe how \_\_\_\_ is helpful, generous, thoughtful, or supportive of you. Include what does he/she do, how does it make you feel, and how often does \_\_\_\_ do those things?

| <b>People often feel different things in different situations. When ____ does things for you, how much do you feel?</b><br>(please write your friend's initials in the blank space above): |              | Not at All |   |   |   | Extremely |
|--------------------------------------------------------------------------------------------------------------------------------------------------------------------------------------------|--------------|------------|---|---|---|-----------|
| 1.                                                                                                                                                                                         | Thankful     | 1          | 2 | 3 | 4 | 5         |
| 2.                                                                                                                                                                                         | Happy        | 1          | 2 | 3 | 4 | 5         |
| 3.                                                                                                                                                                                         | Indebted     | 1          | 2 | 3 | 4 | 5         |
| 4.                                                                                                                                                                                         | Proud        | 1          | 2 | 3 | 4 | 5         |
| 5.                                                                                                                                                                                         | Resentful    | 1          | 2 | 3 | 4 | 5         |
| 6.                                                                                                                                                                                         | Grateful     | 1          | 2 | 3 | 4 | 5         |
| 7.                                                                                                                                                                                         | Admiring     | 1          | 2 | 3 | 4 | 5         |
| 8.                                                                                                                                                                                         | Anger        | 1          | 2 | 3 | 4 | 5         |
| 9.                                                                                                                                                                                         | Sadness      | 1          | 2 | 3 | 4 | 5         |
| 10.                                                                                                                                                                                        | Appreciative | 1          | 2 | 3 | 4 | 5         |
| 11.                                                                                                                                                                                        | Frustrated   | 1          | 2 | 3 | 4 | 5         |
| 12.                                                                                                                                                                                        | Peaceful     | 1          | 2 | 3 | 4 | 5         |
| 13.                                                                                                                                                                                        | Clear        | 1          | 2 | 3 | 4 | 5         |
| 14.                                                                                                                                                                                        | Close        | 1          | 2 | 3 | 4 | 5         |
| 15.                                                                                                                                                                                        | Anxious      | 1          | 2 | 3 | 4 | 5         |
| 16.                                                                                                                                                                                        | Conflicted   | 1          | 2 | 3 | 4 | 5         |
| 17.                                                                                                                                                                                        | Confused     | 1          | 2 | 3 | 4 | 5         |
